# Supplementary material
Source: Springer Nature journal article supplement (https://www.springermedizin.de/resource/supplementary/12885_2014_5043_MOESM2_ESM.pdf/9468098)
Supplement: MOESM2 [file 9468098]

**Genotype distributions of the significant SNPs in TF pathway genes in cases and controls.** ORs, 95% CI and *P*-values determined with respect to the risk allele (**bold**) using logistic regression (additive model). Alleles for the positive DNA strand (UCSC annotated) are shown.

| SNP                     | Cases (n) | Controls (n) | OR   | 95% CI    | <i>P</i> -value (unadj) |
|-------------------------|-----------|--------------|------|-----------|-------------------------|
| <b>rs12120605 (F5)</b>  |           |              |      |           |                         |
| GG                      | 262       | 244          |      |           |                         |
| <b>TG</b>               | 88        | 59           | 1.49 | 1.05-2.11 | 0.024                   |
| TT                      | 6         | 1            |      |           |                         |
| <b>rs6427202 (F5)</b>   |           |              |      |           |                         |
| TT                      | 99        | 103          |      |           |                         |
| <b>CT</b>               | 191       | 165          | 1.32 | 1.04-1.66 | 0.021                   |
| CC                      | 66        | 38           |      |           |                         |
| <b>rs9332542 (F5)</b>   |           |              |      |           |                         |
| <b>GG</b>               | 185       | 124          |      |           |                         |
| <b>AG</b>               | 140       | 155          | 1.32 | 1.04-1.68 | 0.022                   |
| AA                      | 32        | 28           |      |           |                         |
| <b>rs6427199 (F5)</b>   |           |              |      |           |                         |
| <b>GG</b>               | 146       | 97           |      |           |                         |
| <b>AG</b>               | 156       | 161          | 1.27 | 1.02-1.59 | 0.036                   |
| AA                      | 50        | 48           |      |           |                         |
| <b>rs3093261 (F10)</b>  |           |              |      |           |                         |
| CC                      | 106       | 118          |      |           |                         |
| <b>TC</b>               | 175       | 137          | 1.31 | 1.06-1.63 | 0.013                   |
| TT                      | 77        | 51           |      |           |                         |
| <b>rs2069948 (EPCR)</b> |           |              |      |           |                         |
| TT                      | 103       | 118          |      |           |                         |
| <b>TC</b>               | 173       | 125          | 1.25 | 1.01-1.54 | 0.037                   |
| CC                      | 80        | 62           |      |           |                         |
